# Supplementary material
Source: Springer Nature journal article supplement (https://www.springermedizin.de/resource/supplementary/13054_2012_1703_MOESM2_ESM.pdf/9711306)

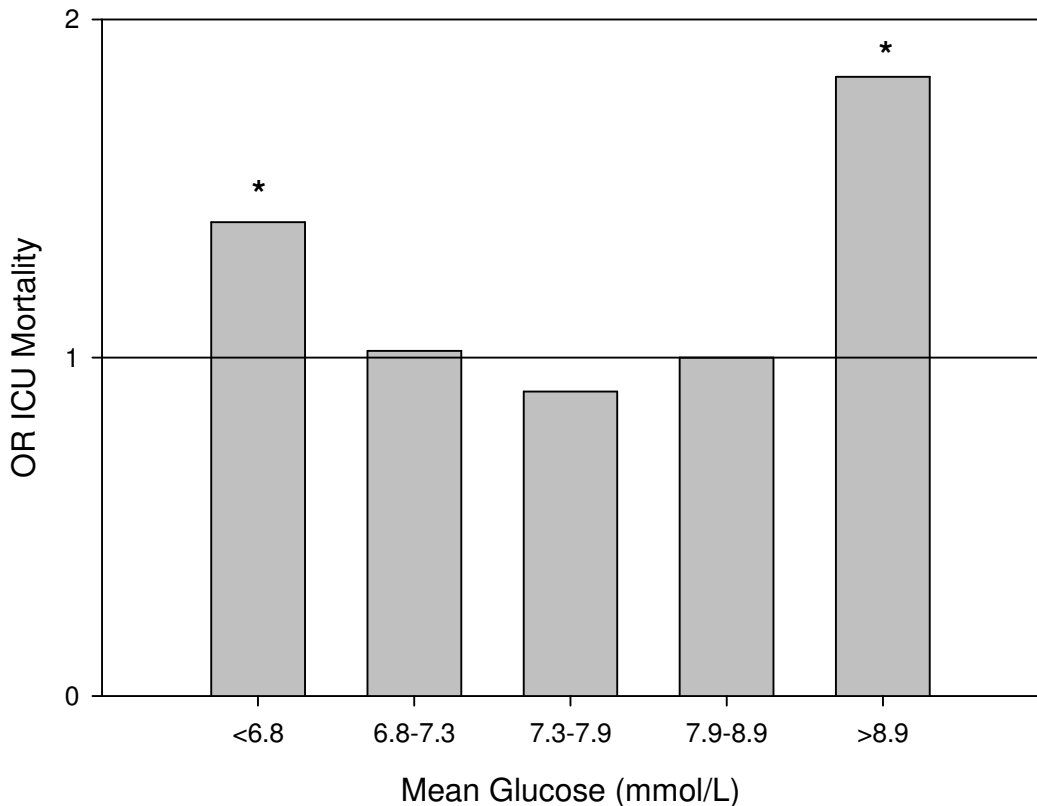

| glucose (mmol/L) | OR Mortality | (95% CI)    | <i>p</i> -value |
|------------------|--------------|-------------|-----------------|
| < 6.8            | 1.40         | (1.0 - 2.0) | 0.04            |
| 6.8-7.3          | 1.02         | (0.7 - 1.4) | 0.90            |
| 7.3-7.9          | 0.90         | (0.6 - 1.3) | 0.55            |
| 7.9-8.9          | Reference    |             | n.a.            |
| > 8.9            | 1.83         | (1.3 - 2.6) | <0.001          |

p for trend: < 0.001

Supplement: MOESM2 [file 9711306]
